# Supplementary material for: Triterpenoid herbal saponins enhance beneficial bacteria, decrease sulfate-reducing bacteria, modulate inflammatory intestinal microenvironment and exert cancer preventive effects in ApcMin/+ mice
Source: PubMed Central journal article supplement (PMC5058752; doi:10.18632/oncotarget.8886), 2016-04-21
Supplement: oncotarget-07-31226-s001.pdf [file oncotarget-07-31226-s001.pdf]

## SUPPLEMENTARY DATA

## REFERENCES

1. Liu X, Lu R, Wu S, Sun J: Salmonella regulation of intestinal stem cells through the Wnt/beta-catenin pathway. *FEBS Lett* 2010; 584:911-916.
2. Willems E, Mateizel I, Kemp C, Cauffman G, Sermon K, Leyns L: Selection of reference genes in mouse embryos and in differentiating human and mouse ES cells. *Int J Dev Biol* 2006; 50:627-635.
3. Dostal A, Baumgartner J, Riesen N, Chassard C, Smuts CM, Zimmermann MB, Lacroix C: Effects of iron supplementation on dominant bacterial groups in the gut, faecal SCFA and gut inflammation: a randomised, placebo-controlled intervention trial in South African children. *Br J Nutr* 2014; 112:547-556.
4. Shanahan MT, Carroll IM, Grossniklaus E, White A, von Furstenberg RJ, Barner R, Fodor AA, Henning SJ, Sartor RB, Gulati AS: Mouse Paneth cell antimicrobial function is independent of Nod2. *Gut* 2014; 63:903-910.
5. Salzman NH, Hung K, Haribhai D, Chu H, Karlsson-Sjoberg J, Amir E, Tegatz P, Barman M, Hayward M, Eastwood D et al: Enteric defensins are essential regulators of intestinal microbial ecology. *Nat Immunol* 2010; 11:76-83.
6. Ren W, Chen S, Yin J, Duan J, Li T, Liu G, Feng Z, Tan B, Yin Y, Wu G: Dietary arginine supplementation of mice alters the microbial population and activates intestinal innate immunity. *J Nutr* 2014; 144:988-995.
7. Nakanishi Y, Nakatsuji M, Seno H, Ishizu S, Akitake-Kawano R, Kanda K, Ueo T, Komekado H, Kawada M, Minami M et al: COX-2 inhibition alters the phenotype of tumor-associated macrophages from M2 to M1 in *ApcMin/+* mouse polypos. *Carcinogenesis* 2011; 32:1333-1339.
8. Li Y, Kundu P, Seow SW, de Matos CT, Aronsson L, Chin KC, Karre K, Pettersson S, Greicius G: Gut microbiota accelerate tumor growth via c-jun and STAT3 phosphorylation in *APCMin/+* mice. *Carcinogenesis* 2012; 33:1231-1238.
9. Ma F, Li Y, Jia L, Han Y, Cheng J, Li H, Qi Y, Du J: Macrophage-stimulated cardiac fibroblast production of IL-6 is essential for TGF beta/Smad activation and cardiac fibrosis induced by angiotensin II. *PLoS One* 2012; 7:e35144.
10. Lam W, Bussom S, Guan F, Jiang Z, Zhang W, Gullen EA, Liu SH, Cheng YCL: The four-herb Chinese medicine PHY906 reduces chemotherapy-induced gastrointestinal toxicity. *Sci Transl Med* 2010; 2:45ra59.
11. Peng DJ, Zeng M, Muromoto R, Matsuda T, Shimoda K, Subramaniam M, Spelsberg TC, Wei WZ, Venuprasad K: Noncanonical K27-linked polyubiquitination of TIEG1 regulates Foxp3 expression and tumor growth. *J Immunol* 2011; 186:5638-5647.

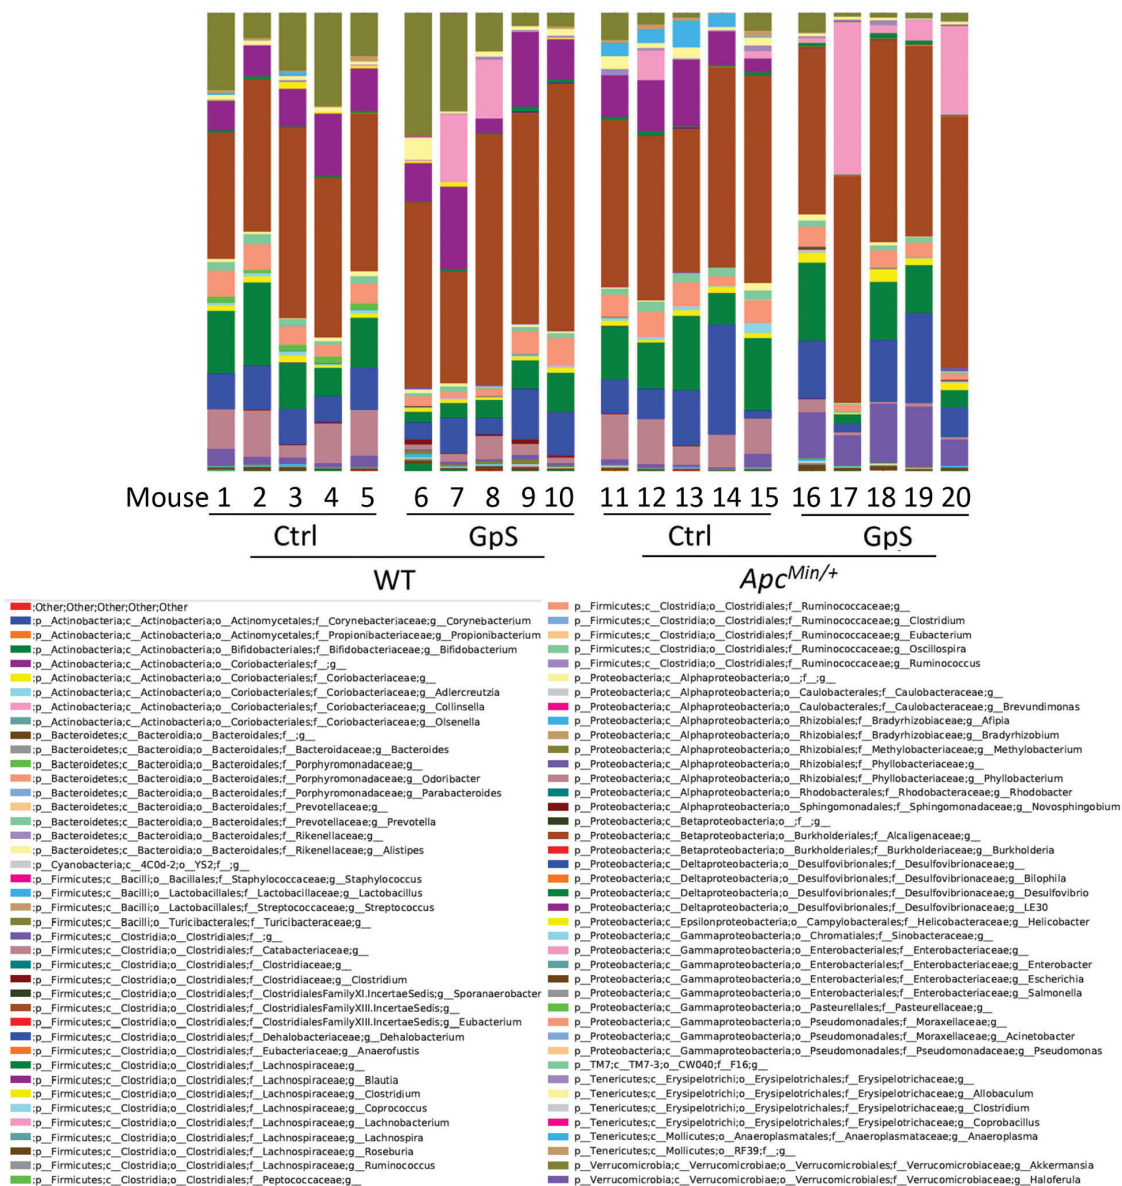

Supplementary Figure S1: A bar chart of the relative abundance of bacterial genera in the individual mice of different treatment groups.

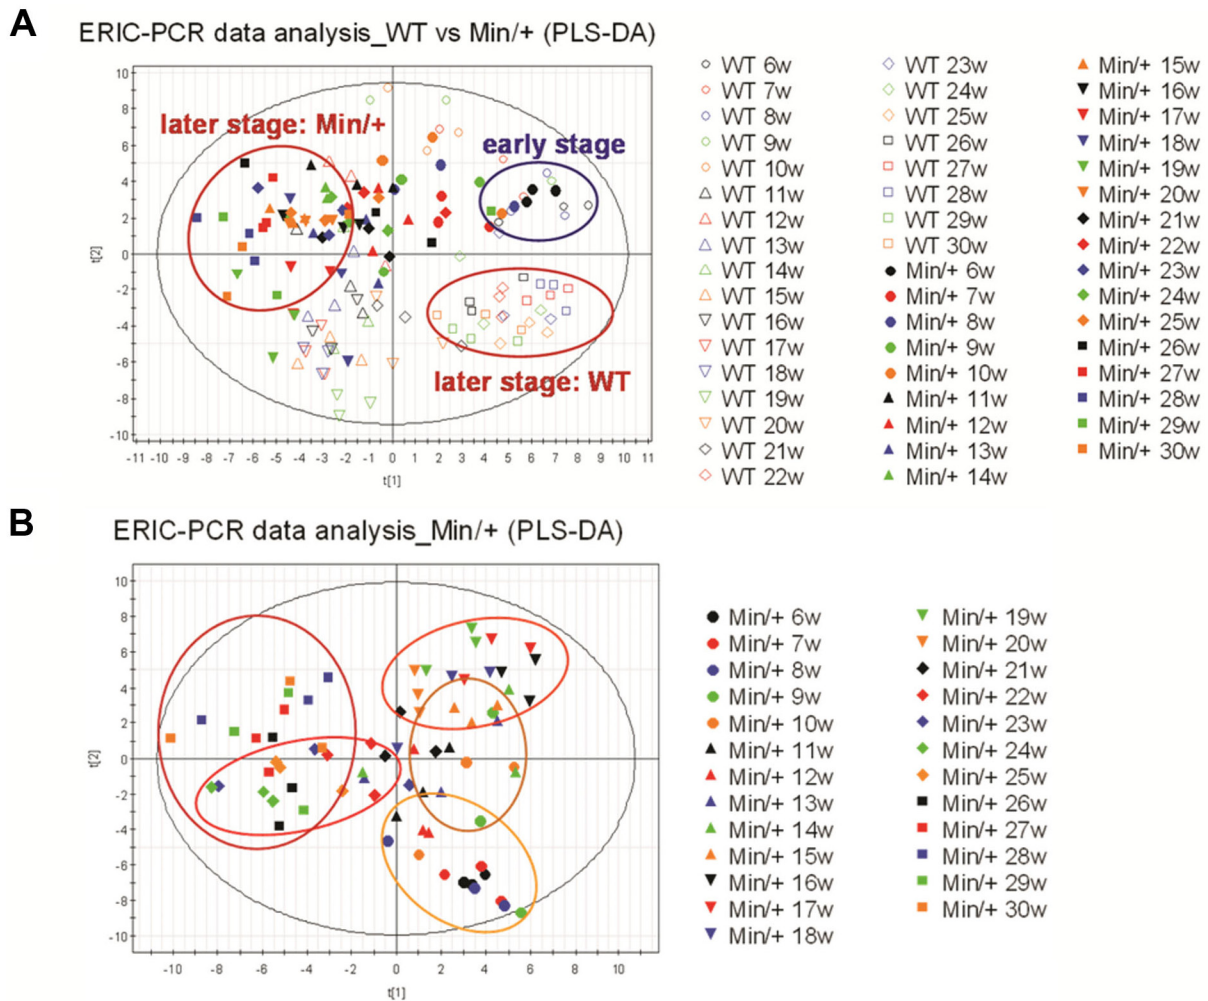

**Supplementary Figure S2: The time course PLS-DA plots of ERIC-PCR DNA profile.** **A.** *Apc*<sup>Min/+</sup> mice versus WT. Open symbols: WT; Solid symbols: *Apc*<sup>Min/+</sup> mice. **B.** *Apc*<sup>Min/+</sup> mice at different disease stages. Different symbol shapes represented for different disease stages. The microbial profiles of *Apc*<sup>Min/+</sup> mice and their WT littermates were characterized from 6 weeks to 30 weeks of age for 25 consecutive weeks. The fecal samples were prepared for genomic DNA and subjected for ERIC-PCR. Gel pictures were digitized by Image Lab 3.0 system (Bio-Rad). Based on the distance and the intensity of each DNA band, SIMCA-P 12.0 tool was applied to obtain the PLS-DA score plots. WT: n=3; *Apc*<sup>Min/+</sup> mice: n=3.

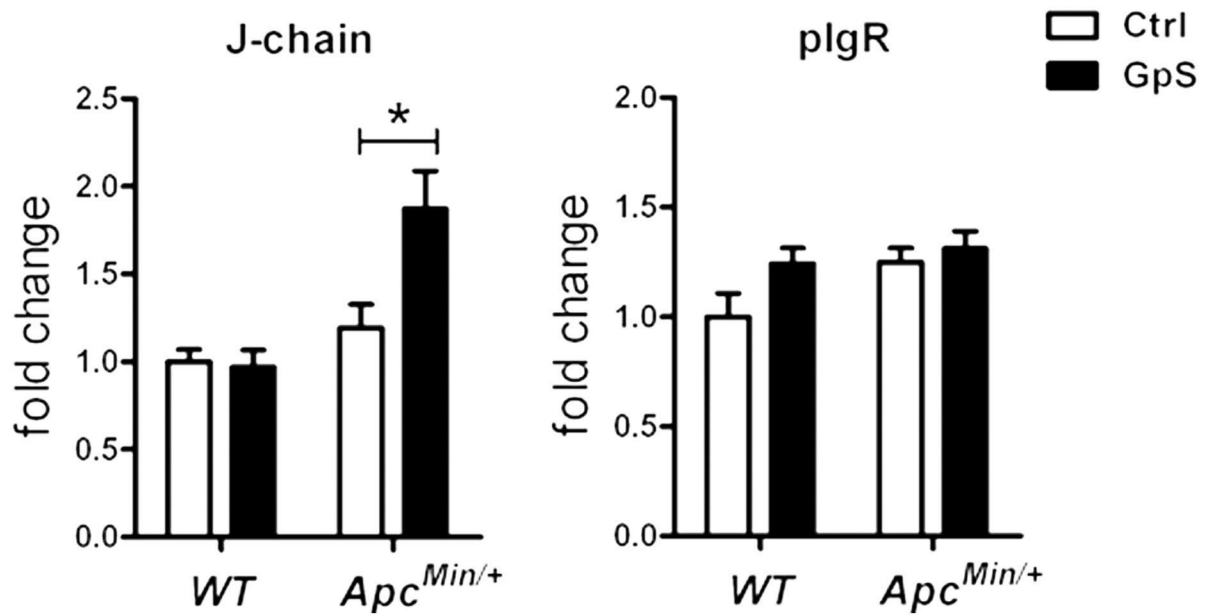

**Supplementary Figure S3: The relative mRNA expression of J-chain and plgR.** J-chain is known to be critical for polymeric immunoglobulin receptor (pIgR)-mediated epithelial transport of IgA. Data were normalized to the expression of reference gene, and expressed as fold change of the WT control group. Data is presented as the mean  $\pm$  SEM (\* P < 0.05, GpS versus control samples); n=6/group.

Supplementary Table S1: Primers for Quantitative Real-Time PCR

| Target gene                           | Nucleotide sequence of primers (5' to 3') |                         | References |
|---------------------------------------|-------------------------------------------|-------------------------|------------|
|                                       | Forward                                   | Reverse                 |            |
| <i>β-actin</i>                        | TGTTACCAACTGGGACGACA                      | CTGGGTCACTTTTCACGGT     | [1]        |
| <i>Hprt1</i>                          | TCAGTCAACGGGGACATAAA                      | GGGGCTGTACTGCTTAACCAG   | [2]        |
| <i>dsrA</i>                           | CTGCGAATATGCCTGCTACA                      | TGGTCGARCTTGATGTCGTC    | [3]        |
| <i>PanCrp</i>                         | GGTGATCATCAGACCCCAGCATCAGT                | AAGAGACTAAAAGTGGAGCAGC  | [4]        |
| <i>Lyz 1</i><br>( <i>P-lysozyme</i> ) | GCCAAGGTCTACAATCGTTGTGAGTTG               | CAGTCAGCCAGCTTGACACCACG | [5]        |
| <i>Lyz 2</i><br>( <i>M-lysozyme</i> ) | GGCTGGCTACTATGGAGTCAGCCTG                 | GCATTCACAGCTCTGGGGTTTTG | [5]        |
| <i>MUC2</i>                           | CCCAGAAGGGACTGTGTATG                      | TTGTGTTGCTCTTGGTCAG     | [6]        |
| <i>MUC4</i>                           | GTCTCCCATCACGGTTCAGT                      | TGTCATTCCACACTCCCAGA    | [6]        |
| <i>J-chain</i>                        | GAACCTTTGTATAACCATTTGTCAGACG              | CTGGGTGGCAGTAACAACCT    | [6]        |
| <i>pIgR</i>                           | AGTAACCGAGGCCTGTCCTT                      | GTCACTCGGCAACTCAGGA     | [6]        |
| <i>iNOS</i>                           | GTTCTCAGCCCAACAATACAAGA                   | GTGGACGGGTCGATGTCAC     | [7]        |
| <i>CXCL10</i>                         | CCAAGTGCTGCCGTCATTTTC                     | GGCTCGCAGGGATGATTTCAA   | [7]        |
| <i>Arginase 1</i>                     | TGGCTTGCGAGACGTAGAC                       | GCTCAGGTGAATCGGCCTTTT   | [7]        |
| <i>Ym1</i>                            | TTATCCTGAGTGACCCTTCTAAG                   | TCATTACCCTGATAGGCATAGG  | [7]        |
| <i>Trem2</i>                          | CTGGAACCGTCACCATCACTC                     | CGAAACTCGATGACTCCTCGG   | [7]        |
| <i>MR</i>                             | GCTGAATCCCAGAAATTCCGC                     | ATCACAGGCATACAGGGTGAC   | [7]        |
| <i>IFN-γ</i>                          | ATGAACGCTACACACTGCATC                     | CCATCCTTTTGCCAGTTCCTC   | [7]        |
| <i>TNF-α</i>                          | CAAATGGCCTCCCTCTCAT                       | CTCCTCCACTTGGTGGTTTG    | [8]        |
| <i>IL-12</i>                          | ACTCTGCGCCAGAAACCTC                       | CACCCTGTTGATGGTCACGAC   | [7]        |
| <i>IL-4</i>                           | GGTCTCAACCCCCAGCTAGT                      | GCCGATGATCTCTCTCAAGTGAT | [7]        |
| <i>IL-10</i>                          | GCTCTTACTGACTGGCATGAG                     | CGCAGCTCTAGGAGCATGTG    | [7]        |
| <i>IL-13</i>                          | GGATATTGCATGGCCTCTGTAAC                   | AACAGTTGCTTTGTGTAGCTGA  | [7]        |
| <i>IL-1β</i>                          | GCTGAAAGCTCTCCACCTCA                      | GGCCACAGGTATTTTGTTCGT   | [8]        |
| <i>IL-6</i>                           | CTTCCATCCAGTTGCCTTCTTG                    | AATTAAGCCTCCGACTTGTGAAG | [9]        |
| <i>IL-18</i>                          | CCTGACATCTTCTGCAACCT                      | TTCCGTATTACTGCGGTTGT    | [10]       |
| <i>IL-23</i>                          | GCACCTGCTTGACTCTGACA                      | ATCCTCTGGCTGGAGGAGTT    | [8]        |
| <i>Foxp3</i>                          | CCCATCCCCAGGAGTCTTG                       | ACCATGACTAGGGGCACTGTA   | [11]       |
| <i>IL-17</i>                          | TTAACTCCCTTGGCGCAAAA                      | CTTCCCTCCGATTGACAC      | [11]       |
